# Supplementary material
Source: PubMed Central journal article supplement (PMC4216526)
Supplement: Supp_Fig1.pdf [file Supp_Fig1.pdf]

## Supplementary Data

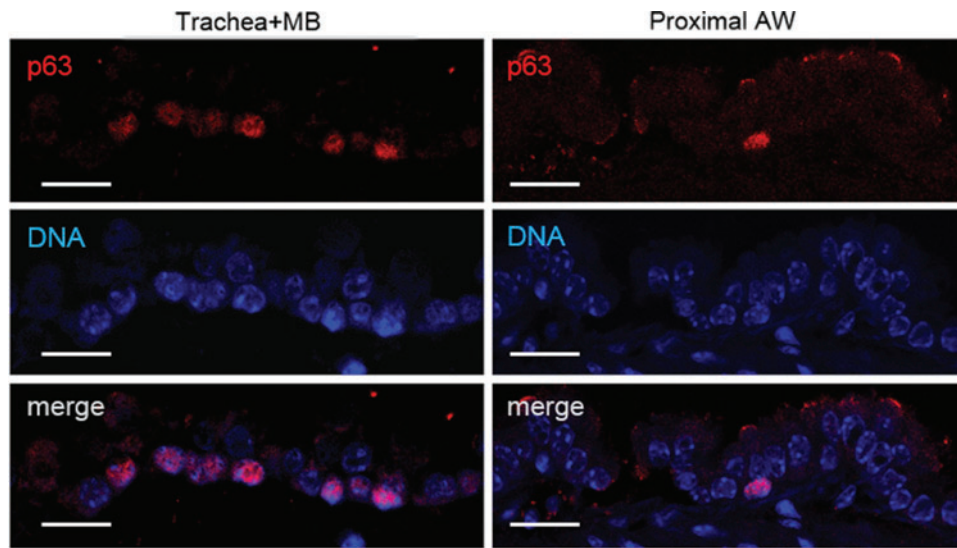

**SUPPLEMENTARY FIG. S1.** Expression of p63 in epithelial cells of trachea and proximal airways. Representative images of p63-expressing cells in the trachea and rare cells with nuclear p63 staining (*red*) found in the proximal airway epithelium. Scale bar: 20  $\mu\text{m}$ .
