# Supplementary material
Source: PubMed Central journal article supplement (PMC4216526)
Supplement: Supp_Fig2.pdf [file Supp_Fig2.pdf]

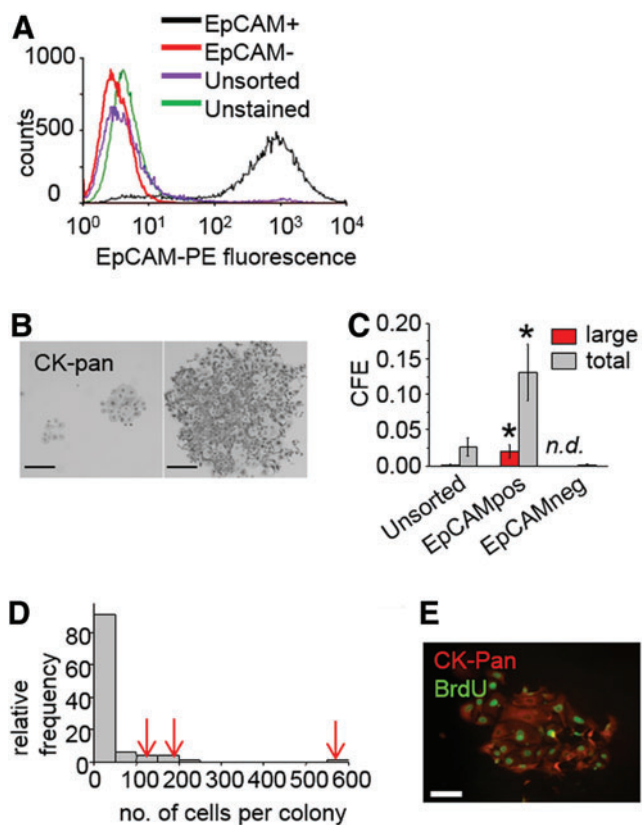

**SUPPLEMENTARY FIG. S2.** Growth of pulmonary epithelial cells in low  $\text{Ca}^{2+}$  medium-based 2D culture system. **(A)** Isolation of epithelial cells using anti-EpCAM antibody conjugated with PE and anti-PE-coated magnetic microbeads. **(B)** Representative images of small and large colonies at 10 days in culture. **(C)** Colony-forming efficiency (CFE) (large colonies, *red bars* and total colonies, *gray bars*) by unsorted, EpCAM<sup>pos</sup>, and EpCAM<sup>neg</sup> mouse lung cells. **(D)** Frequency distribution of colony sizes 10 days after plating; *arrows* indicate large colonies ( $n=107$  epithelial colonies). **(E)** BrdU incorporation over 24 h in cells of secondary colonies 4 days after plating mitotic shake-off cells. Scale bars: **B**, 1 mm; **C**, 40  $\mu\text{m}$ . \*,  $P < 0.05$  by ANOVA; n.d., not detectable.
