# Supplementary material
Source: PubMed Central journal article supplement (PMC4216526)
Supplement: Supp_Fig4.pdf [file Supp_Fig4.pdf]

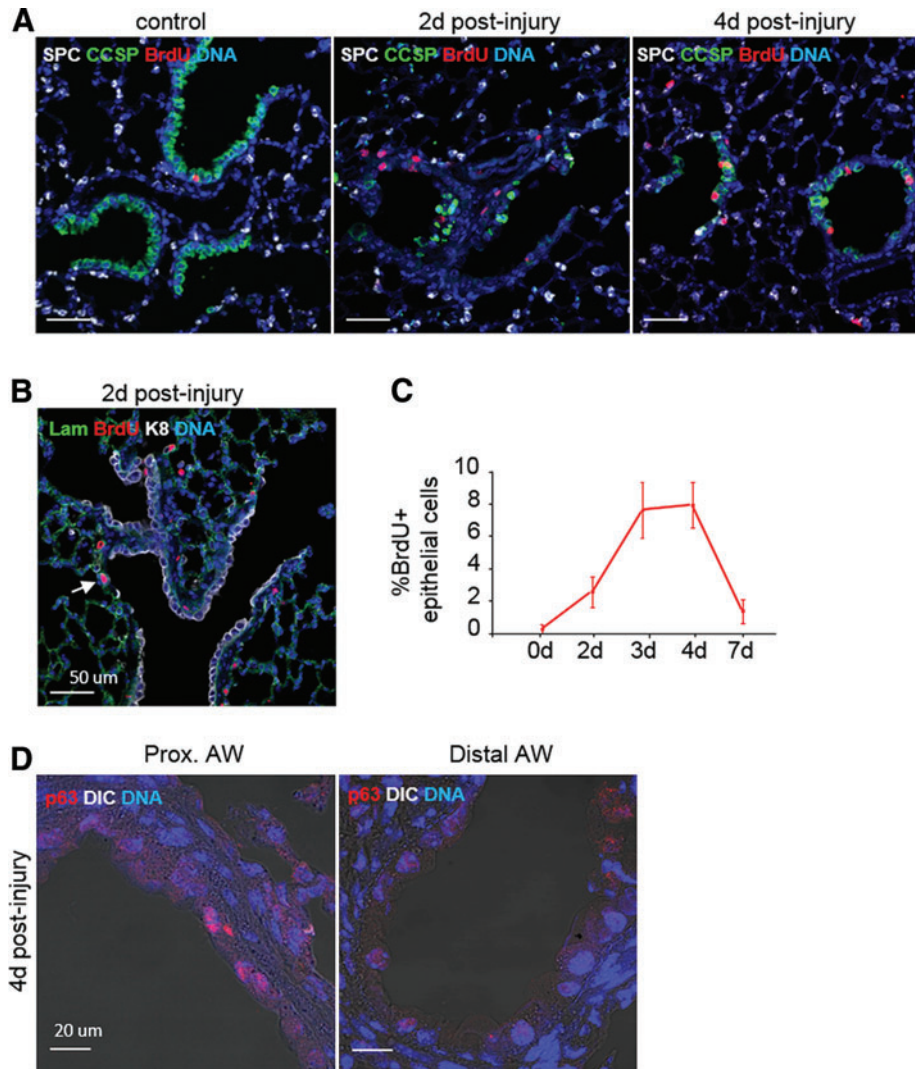

**SUPPLEMENTARY FIG. S4.** Proliferation in naphthalene-injured lung epithelium. Animals were injected with naphthalene and BrdU as described under Materials and Methods section. **(A)** Representative images of sections from lungs of control naphthalene-challenged animals at 2 and 4 days of recovery, stained with antibodies against BrdU (*red*), CCSP (*green*), and pro-SPC (*white*). **(B)** Representative images of a lung section at day 2 after naphthalene-induced injury, stained with antibodies against BrdU (*red*), Laminin (*green*), and Keratin 8/18 (K8, *white*). *Arrow* points to BrdU+ cell. **(C)** The percentage of BrdU-incorporating epithelial (K8/18<sup>pos</sup>) cells evaluated in up to five randomly selected view fields. The data represent mean  $\pm$  SD,  $n=3$  animals. **(D)** Representative images of proximal (*left*) and distal (*right*) airways stained against p63 (*red*) on day 4 after the injury. Scale bars: **A**, 50  $\mu$ m; **B**, 50  $\mu$ m; **D**, 20  $\mu$ m.
