# Supplementary material
Source: PubMed Central journal article supplement (PMC4216526)
Supplement: Supp_Fig5.pdf [file Supp_Fig5.pdf]

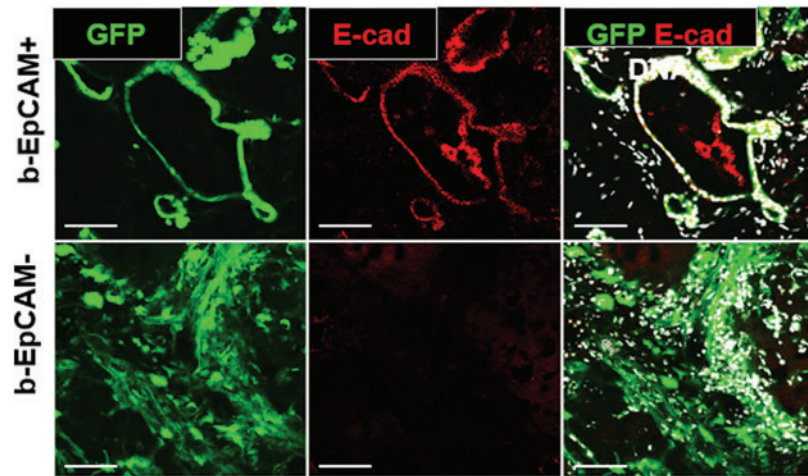

**SUPPLEMENTARY FIG. S5.** In 3D Matrigel, epithelial cysts are derived from EpCAM<sup>pos</sup> cells. Equal numbers of EpCAM<sup>pos</sup> and EpCAM<sup>neg</sup> cells isolated using MACS strategy were isolated from transgenic CAG-EGFP animals and co-cultured with wild-type lung EpCAM<sup>neg</sup> cells. Cultures were fixed at day 21 after plating, and sections were stained with antibodies against E-cadherin (*red*). Scale bar, 100  $\mu$ m.
