# Supplementary material
Source: PubMed Central journal article supplement (PMC4216526)
Supplement: Supp_Fig6.pdf [file Supp_Fig6.pdf]

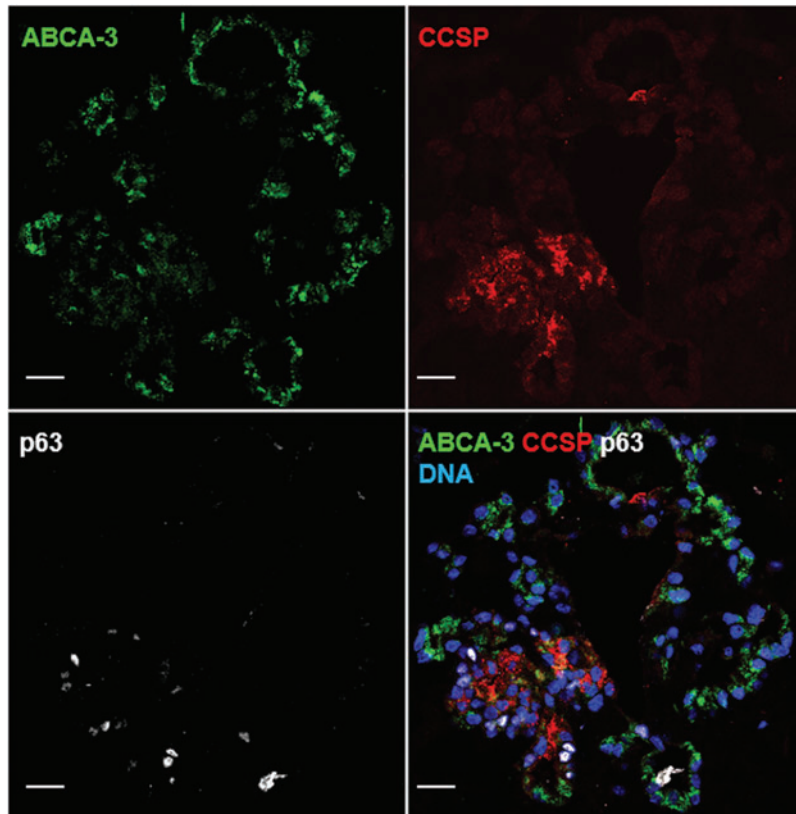

**SUPPLEMENTARY FIG. S6.** A fraction of p63<sup>pos</sup> CCSP<sup>pos</sup> cysts derived from airway epithelium expresses ABCA3, a marker of mature type II alveolocytes. Representative image of immunohistochemical staining of a cyst derived from airway EpCAM<sup>pos</sup> cells with antibodies against p63 (*white*), ABCA3 (*green*), and CCSP (*red*). Scale bar, 20  $\mu$ m.
