# Supplementary material
Source: PubMed Central journal article supplement (PMC4216526)
Supplement: Supp_Fig8.pdf [file Supp_Fig8.pdf]

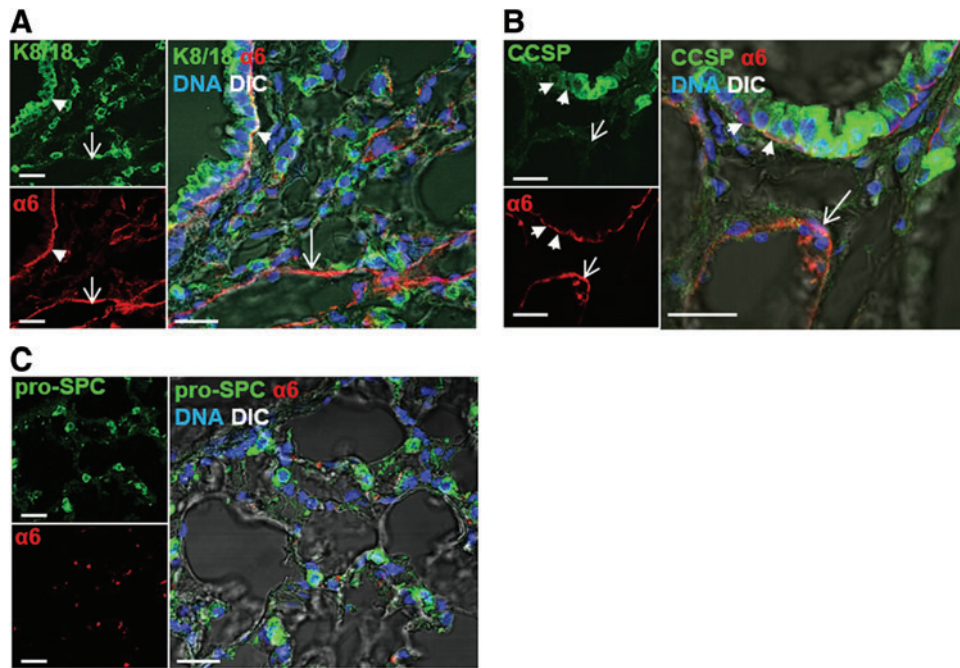

**SUPPLEMENTARY FIG. S8.** Expression of integrin  $\alpha 6$  in mouse lung. Representative immunohistochemistry images of frozen sections of mouse lung. (A) Low resolution image of a distal airway (*arrowhead*), blood vessel (*arrow*), and alveolar region stained with antibodies against integrin  $\alpha 6$  (*red*) and epithelial marker keratin 8/18 (*green*); (B) High-resolution image of a distal airway with integrin  $\alpha 6^{\text{high}}$  cells indicated with *arrowheads* and a vessel (*arrow*) stained with anti- integrin  $\alpha 6$  (*red*) and anti-CCSP (*green*) antibodies; (C) High-resolution image of alveolar region stained with integrin  $\alpha 6$  (*red*) and pro-SPC (*green*) antibodies. Scale bars: A–C, 20  $\mu\text{m}$ .
