# Supplementary material
Source: PubMed Central journal article supplement (PMC4216526)
Supplement: Supp_Fig9.pdf [file Supp_Fig9.pdf]

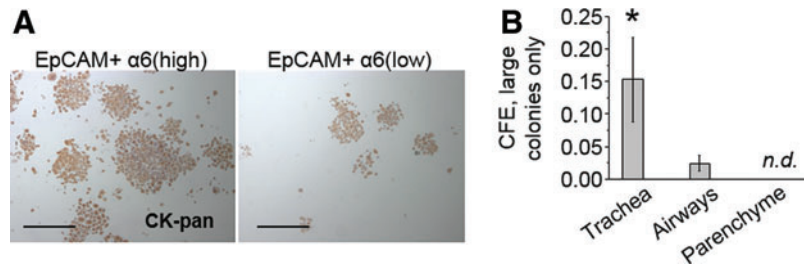

**SUPPLEMENTARY FIG. S9.** Large colony-forming potential of EpCAM<sup>pos</sup> integrin  $\alpha 6^{\text{high}}$  cells isolated from different regions of mouse lung. Efficiency of large colony formation was estimated for EpCAM<sup>pos</sup> integrin  $\alpha 6^{\text{high}}$  and EpCAM<sup>pos</sup> integrin  $\alpha 6^{\text{low}}$  cells isolated by FACS from trachea, airways, and lung parenchyma. Immediately after sorting, cells were plated under the described 2D culture conditions. **(A)** Representative images of colonies formed by airway EpCAM<sup>pos</sup> integrin  $\alpha 6^{\text{high}}$  (*left*) and EpCAM<sup>pos</sup> integrin  $\alpha 6^{\text{low}}$  cells (*right*) at day 10 in culture. Plating density 1,000 cells/cm<sup>2</sup> (10 cm<sup>2</sup> plates) Cells were fixed and stained with antibodies against pan-cytokeratin. **(B)** The number of large (> 100 cells) colonies was estimated for cultures of EpCAM<sup>pos</sup> integrin  $\alpha 6^{\text{high}}$  cells isolated from each region and normalized to cellular input (mean  $\pm$  SD,  $n = 3$  experiments). Scale bar: 500  $\mu\text{m}$ . \*,  $P < 0.05$  by ANOVA; n.d., not detected.
