# Supplementary material
Source: PubMed Central journal article supplement (PMC4216526)
Supplement: Supp_Table1.pdf [file Supp_Table1.pdf]

SUPPLEMENTARY TABLE S1. IDENTIFICATION OF GENES DIFFERENTIALLY EXPRESSED IN EPICAM<sup>POS</sup> INTEGRIN  $\alpha 6^{\text{HIGH}}$  CELLS ISOLATED FROM DIFFERENT REGIONS OF MOUSE LUNG

| <i>gene</i>  | <i>Trachea</i>     | <i>Airways</i>     | <i>Parenchyme</i>  | <i>across regions</i> |
|--------------|--------------------|--------------------|--------------------|-----------------------|
| <b>c-kit</b> | <b>0.628022524</b> | <b>0.000292886</b> | <b>2.60E-05</b>    | <b>0.004553657</b>    |
| <b>CCSP</b>  | <b>4.94E-06</b>    | <b>1.08E-06</b>    | <b>0.000738092</b> | <b>0.003451995</b>    |
| E-cadherin   | 0.033187301        | 0.187918181        | 0.001569322        | 0.789071605           |
| FoxM1        | 0.038991481        | 0.0427384          | 0.023387348        | 0.619734395           |
| <b>ID2</b>   | <b>0.000738092</b> | <b>0.001327769</b> | <b>4.05E-05</b>    | <b>0.000723791</b>    |
| <b>ITGA6</b> | <b>0.001516789</b> | <b>0.002581345</b> | <b>0.001187443</b> | <b>1.08E-06</b>       |
| <b>ITGB4</b> | <b>0.000206162</b> | <b>4.05E-05</b>    | <b>4.05E-05</b>    | <b>0.010655546</b>    |
| <b>K5</b>    | <b>0.000646117</b> | <b>9.79E-05</b>    | <b>0.000103477</b> | <b>0.038577116</b>    |
| <b>KDR</b>   | <b>0.772696877</b> | <b>0.000127727</b> | <b>4.94E-06</b>    | <b>0.002052011</b>    |
| LGR6         | 0.023387348        | 4.94E-06           | 0.102956721        | 0.586094823           |
| Muc5AC       | 0.002581345        | 0.002491248        | N/D                | 0.640113813           |
| <b>NGFR</b>  | <b>0.000456237</b> | <b>6.28E-06</b>    | <b>0.007023855</b> | <b>0.032124023</b>    |
| <b>p63</b>   | <b>0.061072871</b> | <b>0.057000844</b> | <b>0.04705498</b>  | <b>0.047139031</b>    |
| <b>SPC</b>   | <b>4.05E-05</b>    | <b>0.000563423</b> | <b>0.000495272</b> | <b>0.010050114</b>    |
| <b>Sca-1</b> | <b>0.001652257</b> | <b>1.08E-06</b>    | <b>6.15E-05</b>    | <b>0.096941599</b>    |

To identify genes that are differentially expressed between integrin  $\alpha 6^{\text{high}}$  and  $\alpha 6^{\text{low}}$  epithelial cells, expression of each gene was compared by T-test within and across the studied regions. The *P* values were adjusted using Benjamini and Hochberg correction for multiple hypothesis testing [31]. The table represents the adjusted *P* values within and across the specified regions. Genes that are differentially expressed at 10% FDR are highlighted in bold.
